# Supplementary material
Source: PubMed Central journal article supplement (PMC5125855)
Supplement: NIHMS817847-supplement-06.pdf [file NIHMS817847-supplement-06.pdf]

performed on a confocal microscope funded by NIH S10-RR028951. Zebrafish were obtained from ZIRC, which is supported by NIH-NCRR Grant P40 RR012546. We acknowledge additional support from the Eye and Ear Foundation of Pittsburgh and from an unrestricted grant from Research to Prevent Blindness, New York, NY.

## **SUPPLEMENTAL LEGENDS**

### **Figure S1: Periocular mesenchyme cells migrate through the CF during CFC. (A-C)**

Sagittal section views of the CF immunostained with GFP and Lam-111 antibodies to visualize POM cells (green) and BM (red). Section planes as depicted in Figure 1A. (A) *sox10:eGFP* cells at 37 hpf. Few *sox10:eGFP* cells are detected in the CF. (B,C) *fli1a:eGFP* cells at 36 hpf at a central and central/proximal plane within the eye. *fli1a:eGFP* cells spend extended durations in the CF. (D,E) Sagittal section views at central/proximal and distal/central planes of the eye showing *fli1a:eGFP* cells (green) and *sox10:memRFP* cells (red) in the CF at 34 hpf. Scale bar = 20  $\mu\text{m}$

**Supplementary Movie 1** *in vivo* time-lapse imaging of a single optical section within the distal CF from a *membrane-GFP* injected embryo. Time frame is 33 – 50hpf. Scale bar = 50 $\mu\text{m}$ . hh:mm

**Supplementary Movie 2** *in vivo* time-lapse imaging of a single optical section within the distal/central CF from a *membrane-GFP* injected embryo. Time frame is 33 – 50hpf. Scale bar = 50 $\mu\text{m}$ . hh:mm

**Supplementary Movie 3** *in vivo* time-lapse imaging of a single optical section within the proximal CF from a *membrane-GFP* injected embryo. Time frame is 33 – 50hpf. Scale bar = 50 $\mu\text{m}$ . hh:mm

**Supplementary Movie 4** *in vivo* time-lapse imaging of a single optical section within the central CF from a *membrane-GFP* injected *kdrl:mCherry* embryo. Time frame is 33-42.5hpf. Scale bar = 25 $\mu$ m. hh:mm

## References

- Alvarez, Y., Cederlund, M. L., Cottell, D. C., Bill, B. R., Ekker, S. C., Torres-Vazquez, J., Weinstein, B. M., Hyde, D. R., Vihtelic, T. S. and Kennedy, B. N. (2007) 'Genetic determinants of hyaloid and retinal vasculature in zebrafish', *BMC developmental biology* 7: 114.
- Amsterdam, A., Nissen, R. M., Sun, Z., Swindell, E. C., Farrington, S. and Hopkins, N. (2004) 'Identification of 315 genes essential for early zebrafish development', *Proceedings of the National Academy of Sciences of the United States of America* 101(35): 12792-7.
- Asai-Coakwell, M., French, C. R., Berry, K. M., Ye, M., Koss, R., Somerville, M., Mueller, R., van Heyningen, V., Waskiewicz, A. J. and Lehmann, O. J. (2007) 'GDF6, a novel locus for a spectrum of ocular developmental anomalies', *American journal of human genetics* 80(2): 306-15.
- Atkinson-Leadbetter, K., Hehr, C. L. and McFarlane, S. (2014) 'Fgfr signaling is required as the early eye field forms to promote later patterning and morphogenesis of the eye', *Developmental dynamics : an official publication of the American Association of Anatomists* 243(5): 663-75.
- Babb, S. G., Kotradi, S. M., Shah, B., Chiappini-Williamson, C., Bell, L. N., Schmeiser, G., Chen, E., Liu, Q. and Marrs, J. A. (2005) 'Zebrafish R-cadherin (Cdh4) controls visual system development and differentiation', *Developmental dynamics : an official publication of the American Association of Anatomists* 233(3): 930-45.
- Bajpai, R., Chen, D. A., Rada-Iglesias, A., Zhang, J., Xiong, Y., Helms, J., Chang, C. P., Zhao, Y., Swigut, T. and Wysocka, J. (2010) 'CHD7 cooperates with PBAF to control multipotent neural crest formation', *Nature* 463(7283): 958-62.
- Bar-Yosef, U., Abuelaish, I., Harel, T., Hendler, N., Ofir, R. and Birk, O. S. (2004) 'CHX10 mutations cause non-syndromic microphthalmia/ anophthalmia in Arab and Jewish kindreds', *Human genetics* 115(4): 302-9.
- Barbieri, A. M., Broccoli, V., Bovolenta, P., Alfano, G., Marchitello, A., Mocchetti, C., Crippa, L., Bulfone, A., Marigo, V., Ballabio, A. et al. (2002) 'Vax2 inactivation in mouse determines alteration of the eye dorsal-ventral axis, misrouting of the optic fibres and eye coloboma', *Development* 129(3): 805-13.
- Bassett, E. A., Williams, T., Zacharias, A. L., Gage, P. J., Fuhrmann, S. and West-Mays, J. A. (2010) 'AP-2alpha knockout mice exhibit optic cup patterning defects and failure of optic stalk morphogenesis', *Human molecular genetics* 19(9): 1791-804.
- Bermejo, E. and Martinez-Frias, M. L. (1998) 'Congenital eye malformations: clinical-epidemiological analysis of 1,124,654 consecutive births in Spain', *American journal of medical genetics* 75(5): 497-504.
